# Supplementary material
Source: publisher site journal article supplement (https://www.dovepress.com/article/359654)
Supplement: Supplementary file 1 [file get_supplementary_file.php]

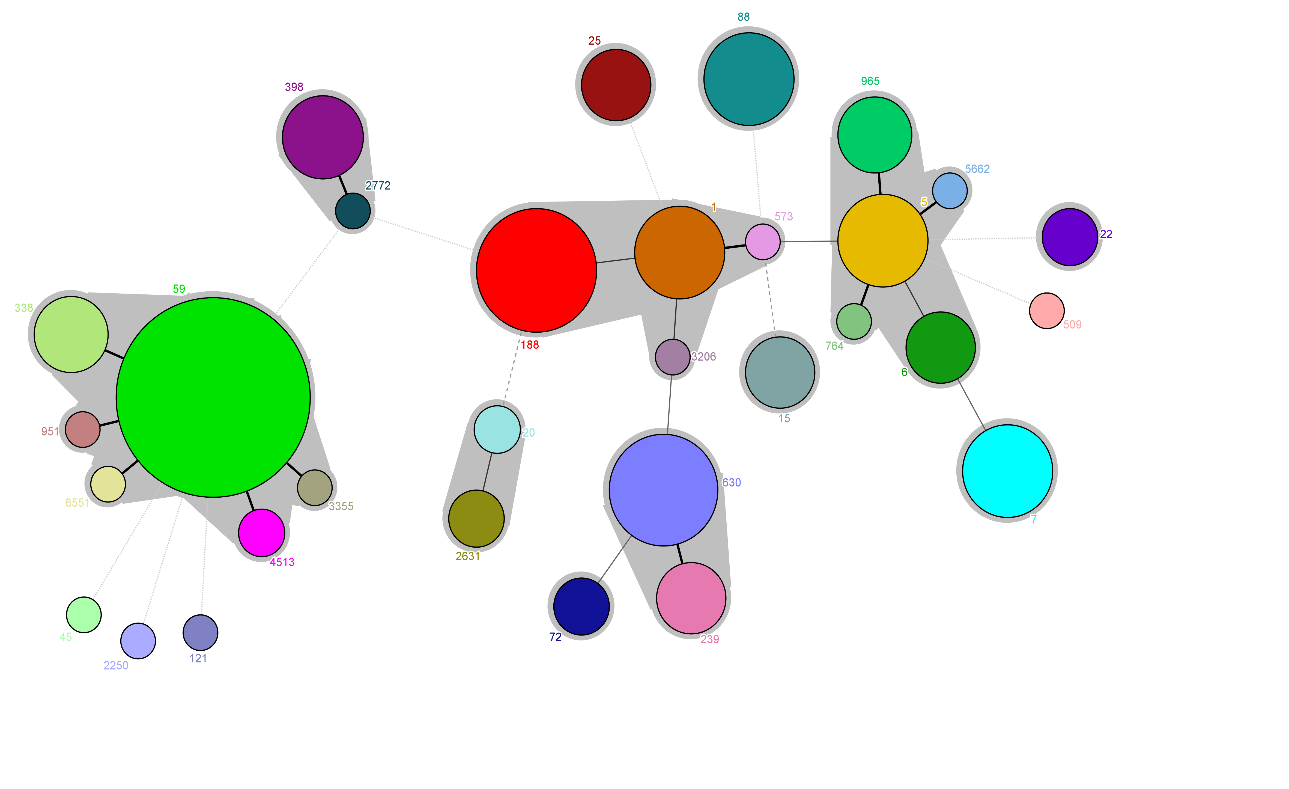


Supplementary Figure Minimal spanning tree based on the multi-locus sequence types of *Staphylococcus aureus* isolates.
